# Supplementary material
Source: publisher site journal article supplement (https://www.dovepress.com/article/360733)
Supplement: Supplementary file 1 [file get_supplementary_file.php]

**Supplementary material**

**Table S1**.Methodology and relevant findings of seventeen KAP studies.

| Author(s) and year | Design | Comparison group | Sample (M:F) | Diagnosis | KET Admin | KET Dosage | Psychotherapy Type | Timing of KET administration | Description of KAP Intervention | Setting | Relevant findings | Adverse Events | Attrition |
| --- | --- | --- | --- | --- | --- | --- | --- | --- | --- | --- | --- | --- | --- |
| Wilkinson et al., 202135 | RCT | (1) CBT vs. (2) TAU | Phase 1: 42 (N/S) Phase 2: 28 (13:15) | MDD | IV | 0.5 mg/kg over 40min | CBT | Multiple (6) KET infusions over 3 weeks prior to enrollment in CBT | Participants (42) were treated with 6 KET sessions over 3 weeks. 28 (66.67%) KET responders were randomized into CBT or TAU. CBT was offered twice weekly for 2 weeks, then weekly sessions for 12 weeks. | Yale Interventional Psychiatric Clinic | Twenty-eight of 42 (66.7%) of participants responded to KET. A significant difference in pre-to-post MADRS and QIDS scores were found between the CBT group (n=14) and TAU group (n=14), with greater sustained improvements in CBT group at week 17. | No treatment-emergent AEs. 5 serious AEs reported (3 in CBT group and 2 in TAU). All had increased severity of depression, with 1 aborted suicide attempt, and 1 suicidal gesture. | 14 subjects did not respond to KET and did not continue in the study. 3 of the 14 participants in the CBT group did not complete CBT protocol. |
| Pradhan et al., 201838 | Pilot study: Double Blinded RCT | (1) KET vs. (2) Saline | 20 (8:12) | PTSD | IV | 0.5mg/kg over 40min | TIMBER, mini-TIMBER | During first psychotherapy (mini-TIMBER) | Both groups received a total of 12 TIMBER sessions, consisting of 3 min-TIMBER sessions offered during infusion, on day 2, and day 8, followed by 9 weekly full-TIMBER sessions, each session lasting 45 min. | Department of Psychiatry and Department of Anesthesiology of the Cooper University Hospital | All participants experienced significant remission (60%) of PTSD symptoms after 24 hours. Comparison of duration of sustained response was significantly greater in the KET group (34.44 +/- 19.12 days) compared to saline (16.5 +/- 11.39 days). | AEs not assessed or reported. | All subjects completed protocol, no attrition reported. |
| Krupitsky et al., 200243 | Double Blinded RCT | (1) Low dose Vs. (2) High dose | 70 (55:15) | Heroin addiction | IM | Group 1 (0.2mg/kg im);  Group 2  (2.0mg/kg im). | Existentially oriented psychotherapy | During 1.5-2 hour psychotherapy session | 10 hours of psychotherapy were provided prior to KET admin. One 1.5-2h psychotherapy sessions provided concurrently with KET injection. An additional 5 hours of psychotherapy provided following KET admin. | Leningrad Regional Center of Addictions inpatient department | Rates of both relapse and abstinence in the high dose group were statistically significant for almost all of the follow-ups in 24 months (excluding months 7,8) when compared to the low-dose group. | 20-30% increased systolic and diastolic blood pressure during KET admin. | N/S |
| Duek et al., 201939 | RCT | (1) KET Vs. (2) Midazolam | 17 (N/S) | PTSD | IV | 0.5mg/kg over 40min | Prolonged Exposure therapy | Following first exposure session | 7 daily sessions of prolonged exposure therapy with a single 40 min KET or midazolam infusion following the first exposure session. | MRI facility | At the 30-day follow-up, PTSD scores were significantly reduced in both groups. After 90 day follow-up, PTSD symptoms were lower in the KET group. | AEs not assessed or reported. | N/S |
| Dakwar et al., 202042 | Pilot study: Double Blinded RCT | (1) KET Vs. (2) Midazolam | 40 (19:21) | SUD: Alcohol | IV | 0.6 mg/kg over 52min | MET | During week 2 day 2 of psychotherapy | 6 MET sessions were provided over 5 weeks. Sessions took place once a week, with an additional session offered during the second week, 24 hours after drug infusion. | New York State Psychiatric Institute outpatient clinic | KET significantly increased the likelihood of abstinence, delayed the time to relapse, and reduced the likelihood of heavy drinking days compared with midazolam. | AEs not assessed or reported. | 6 participants in the midazolam group dropped out (5 after the 1st week and 1 after infusion). No drop outs in the KET group. At the 6-month follow-up, 21 of 40 (52.5%) could not be reached; 9 belonged to the KET group, and 12 belonged to the midazolam group. |
| Dakwar et al., 201945 | Double Blinded RCT | (1) KET Vs. (2) Midazolam | 55 (41:14) | SUD: Cocaine | IV | 0.5 mg/kg over 40min | MBRP | During 2nd treatment day. | Participants received 5-weeks of treatment. Participants received MBRP on days 1-5. On day 2, subjects were guided through the infusion and were provided a MBRP session after drug administration. Patients returned for twice-weekly MBRP sessions for 4 weeks. | New York State Psychiatric Institute outpatient clinic | Overall, 48.2% of participants in the KET group maintained abstinence over the last 2 weeks of trial compared to 10.7% of the midazolam group. The KET group was 53% less likely to relapse than the midazolam group. | AEs not assessed or reported. | A total of 23 subjects dropped out of the study; 16 of 28 (57.14%) in the midazolam group and 7 of 27 (25.9%) in the KET group. |
| Krupitsky et al., 200744 | RCT | (1) Single KET dose vs. (2) Multiple KET dose | 59 (49:10) | SUD: Heroin | IM | 2.0mg/kg | CBT, MET | After 5h of therapy and during KAP session. | Before the KET session, participants received 5 hours of psychotherapy, and 5 hours of psychotherapy after the first KET session. Those in the multi-dose group returned at 1 and 2 months for additional KET sessions. Addiction counselling sessions were provided before each KET session. Those in the single-dose group returned at 1 and 2 months for addiction counselling only. | Leningrad Regional Center of Addictions inpatient department | At one-year follow-up, multi-dose group demonstrated higher levels of heroin abstinence. 13 of 26 in multi-dose KAP group remained abstinent compared to single KAP group (6 of 27). | 20-30% increased systolic and diastolic blood pressure during KET admin. | 6 of 59 participants relapsed then dropped out of the study prior to randomization. 4 of 26 patients assigned to the multi-dose group relapsed then dropped out following 2nd KET session. 7 of 27 participants in the single-dose group relapsed and dropped out after the 1st counselling session. |
| Keizer et al., 201921 | Case Series | N/A | 11 (9:3) | PTSD and Chronic Neuropathic Pain | IV | (2 μg/kg/min) increased by (1-2μg/kg/min every 3-4 hours up to a max of (11-15μg/kg/min) over 5 days | N/A | Concurrent | Patients received a continuous KET infusion. This max dose was maintained for 96 hours before patients were titrated down and discharged by day 5. Psychotherapy was provided daily for an average of 90 min. | In-patient setting | Seven out of 11 (63.6%) patients showed a clinically significant pre-to-post reduction in PCL (PTSD) scores. Six out of 11 (54.5%) showed reductions in pain. Three of 11 (27.3%) reported increased pain. | Three of 11 patients reported increased pain following KAP | N/S |

| Adams et al., 201736 | Case Study | N/A | 1 (1:0) | OCD and Comorbid MDD | IN | 50mg | CBT | Concurrently during weeks 3-6 | The patient received 8 weeks of inpatient care and 8 weeks of outpatient treatment. During his inpatient stay, CBT was provided every week day with 1-2 hours of CBT homework. Therapy during weeks 3-6 was accompanied by twice weekly concurrent KET administration, with 50 mg delivered in five 10 mg doses over a 20 min period. Patient was discharged 2 weeks after final KET treatment and continued CBT twice weekly for 1 month, then once weekly for another month. | KET Admin. in in-patient setting; psychotherapy admin. in out-patient setting | Patient reported less distress relating to OCD symptoms at 16 weeks, however MDD symptoms remained severe. | Depression and OCD severity increased after discharge from inpatient care but resolved with continued CBT. | N/A |
| --- | --- | --- | --- | --- | --- | --- | --- | --- | --- | --- | --- | --- | --- |
| Ocker et al., 201922 | Case Study | N/A | 1 (1:0) | CRPS-1 and resultant opioid-induced hyperalgesia | IV | (0.09mg/kg/h) at admission, titrated up in 10 mg/h to a maximum of 0.77mg/kg/h over 5 days | CBT | Before CBT | Patient started a continuous IV KET which lasted 5 days. On the day of discharge, KET was reduced by 50% then discontinued. After discharge, the patient received CBT every 3-4 weeks. Patient returned at 6 months for another 5-day infusion of KET, and continued CBT sessions for another 6 months. A year after initial infusion, the patient was scheduled for another 5-day KET infusion. | KET admin. in in-patient setting; psychotherapy admin. in outpatient setting via telemedicine. | Patient remained opioid free while experiencing major improvements in function and lifestyle. At the 6 month follow-up, patient report a dramatic reduction in pain (2/10) compared to baseline (9/10). | Patient experience mild hallucinations during day 3 and 4 of initial KET infusion, which resolved with 2 doses of lorazepam. | N/A |

| Halstead et al., 202140 | Case Study | N/A | 1 (0:1) | PTSD, MDD | SL | 150 mg | MCBT, FAP | Before, during, and after KET administration. | Patient received a preparatory psychotherapy session prior to KET. During the first dosing session, the patient held the KET lozenges in their mouth for 10 min before swallowing. Psychotherapy was provided throughout the KET session. This was followed by another integration psychotherapy session. Second, third, and fourth dosing sessions were also followed by integration sessions. | Private practice | PTSD - Improvement maintained at 6-month follow-up. Depressive symptoms below baseline at 6-month follow-up. | AEs not assessed or reported. | N/A |
| --- | --- | --- | --- | --- | --- | --- | --- | --- | --- | --- | --- | --- | --- |
| Becker, 201428 | Case Study | N/A | 2 (0:2) | MDD, BP I, EDNOS | IM | 25 mg | N/S | During 2nd session | Both patients were prepared for KET sessions, and guided through the session by the psychotherapist. Both patients received a follow-up integrating session. | Private practice | Case 1: Increased adherence and engagement to treatment plan, enhanced boundary setting, return to regular eating, increased quality of sleep. Case 2: Decrease in depression up to 6 months | AEs not assessed or reported. | N/A |
| Rodriguez et al., 201637 | Open Label Clinical Trial | N/A | 10 (N/A) | OCD | IV | 0.5 mg/kg over 40 min | CBT | KET administered after 1st CBT session | Participants received a 90 min CBT session the day before the single KET infusion. Followed by 10 one-hour exposure sessions over 2 weeks. | N/S | From baseline to 4 weeks post infusion, OCD severity was decreased over time. | AEs not assessed or reported. | 1 subject did not complete KET infusion. |
| Wilkinson et al., 201734 | Open Label Clinical Trial | N/A | 16 (4:12) | MDD | IV | 0.5 mg/kg over 40 min | CBT | First dose of KET administered before 1st CBT session, then provided concurrently with CBT on different days | Participants received CBT 24-48h following first KET session, then were offered CBT sessions twice weekly concurrently with the 3 remaining KET sessions (on different days) over 2 weeks. CBT was then provided weekly for an additional 8 weeks. | Yale Interventional Psychiatric Clinic | Eight (50%) subjects responded to KET infusions. Seven (85.7%) of the KET responder’s experiences remission of symptoms. Of the remitters 4/7 did so following 1st KET session, 2/7 did so following 2nd KET session, 1/7 did so after 4th KET session. Five of 8 (62.5%) relapsed by study termination, median time to relapse was 12 weeks from remission. | AEs not assessed or reported. | 8 of 16 subjects did not respond to KET. 1 subject withdrew after 2nd KET infusion, 1 subject withdrew after 3 infusions, 5 withdrew during CBT protocol. |
| Azhari et al., 202146 | Proof of concept: Open label | N/A | 8 (4:4) | SUD: Cannabis | IV | (0.71 mg/kg);(1.41mg/kg) for non-responders | MET and MBRP | KET administered concurrently with mindfulness exercises following MET session and prior to MBRP | Participants received a single MET session prior to KET, and were guided during the session by the therapist. An additional MET session was administered the evening following KET session. For those receiving the 2nd infusion, an additional MET session was administered following the second KET session. MBRP was provided twice weekly from weeks 3-6. | N/S | Frequency of cannabis use decreased significantly from baseline and remained reduced at the end of study. | No adverse events were noted, all participants tolerated KET infusion. | All participants completed protocol. |
| Shiroma et al., 202041 | Proof of concept: Open label | Not applicable | 12 (7:3) | PTSD | IV | 0.5 mg/kg | Prolonged exposure therapy | KET administered 24 hours before therapy. | Subjects received IV KET 24h before 3 weekly psychotherapy sessions, followed-up with up to 7 additional psychotherapy sessions. | N/S | PTSD scores significantly decreased from baseline to the end of treatment. | AEs not assessed or reported. | 2 subjects did not complete treatment. |
| Dore et al., 201923 | Retrospective multi-center | N/A | 235 (120:115) | MDD, PTSD, ADHD, GAD, SUD, OCD,  BP | IM - In office; SL - At home | SL average (200-250mg) IM average (80-90 mg) | N/S | KET administered during psychotherapy, and after in home sessions | SL and/or IM KET was administered to patients. In office, IM KET was administered and then adjusted for home use. Some patients were prescribed SL KET for home use. Average KAP sessions were held about 2 weeks apart, where psychotherapy was administered concurrently with KET. Patients taking SL KET at home did not exceed more than 6 sessions over two weeks. Number of in-office sessions ranged from 1-25. | Private practices; optional home sessions | Number of KET sessions positively correlated with improvements in depression. Longer total duration of treatment resulted in greater improvements in anxiety and depression. | 1-2% of patients did not respond to ketamine. IM KET (14%) and SL KET (7%) patients reported nausea. IM KET (6%) and SL KET (2%) patients reported vomiting. IM KET (2%) and SL KET (4%) patients reported agitation. | N/A |

**Abbreviations:** AE, adverse events; ADHD, attention deficit hyperactivity disorder; Approx, approximately; BP, bipolar disorder; CBT, cognitive behavioral therapy; CRPS-1, chronic regional pain syndrome type 1; EDNOS, eating disorder not otherwise specified; GAD, generalized anxiety disorder; IM, intramuscular; IN, intranasal; IV, intravenous; KAP, ketamine assisted psychotherapy; KET, ketamine; MADRS, Montgomery-asberg depression rating scale; MBI, mindfulness based intervention; MBRP, mindfulness-based relapse prevention; MDD, major depressive disorder; MET, motivational enhancement therapy; MRI, magnetic resonance imaging; N/A, not applicable; N/S, not specified; OCD, obsessive-compulsive disorder; PLC, posttraumatic stress disorder checklist; PTSD, post-traumatic stress disorder; QIDS, quick inventory of depressive symptomatology; RCT, randomized control trial; SL, sublingual; SUD, substance use disorder; TAU, treatment as usual; TIMBER, trauma interventions using mindfulness-based extinction and reconsolidation.
